# Supplementary material for: Molecular Deconvolution Platform to Establish Disease Mechanisms by Surveying GPCR Signaling
Source: PubMed Central journal article supplement (PMC6077248; doi:10.1016/j.celrep.2018.06.080), 2018-07-17
Supplement: mmc1.pdf [file mmc1.pdf]

**Cell Reports, Volume 24**

**Supplemental Information**

**Molecular Deconvolution Platform  
to Establish Disease Mechanisms  
by Surveying GPCR Signaling**

**Ikuo Masuho, Sreenivas Chavali, Brian S. Muntean, Nickolas K. Skamangas, Kristina Simonyan, Dipak N. Patil, Grant M. Kramer, Laurie Ozelius, M. Madan Babu, and Kirill A. Martemyanov**



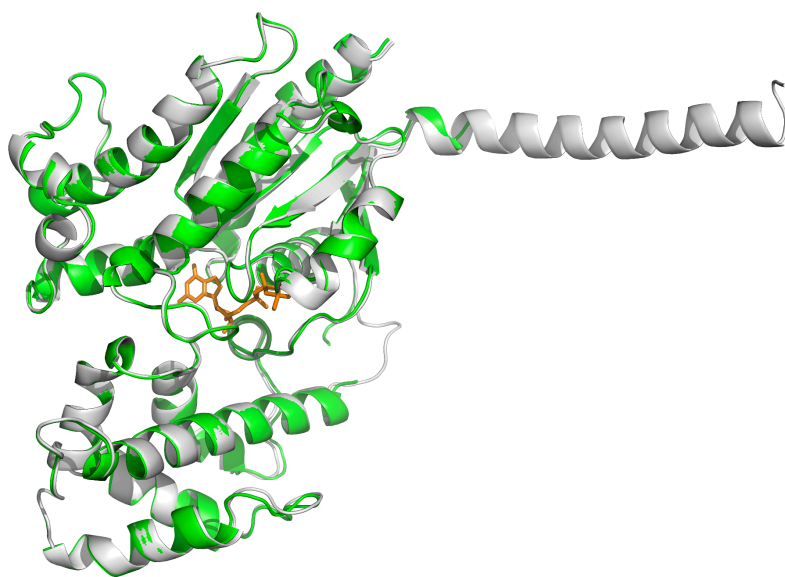

**Figure S2. Evaluation of the structural model of G $\alpha$ olf. Related to Figure 3.**

Since G $\alpha$ olf shares 88% amino-acid identity with G $\alpha$ s, the homology model of G $\alpha$ olf was constructed on the basis of the crystal structure of the G $\alpha$ s (1AZT). The G $\alpha$ s crystal structure (green) and the G $\alpha$ olf model (gray) were overlaid. The G $\alpha$ olf model results in root mean square deviations of 0.31 Å, indicating a good fit between the model and the reported structure.

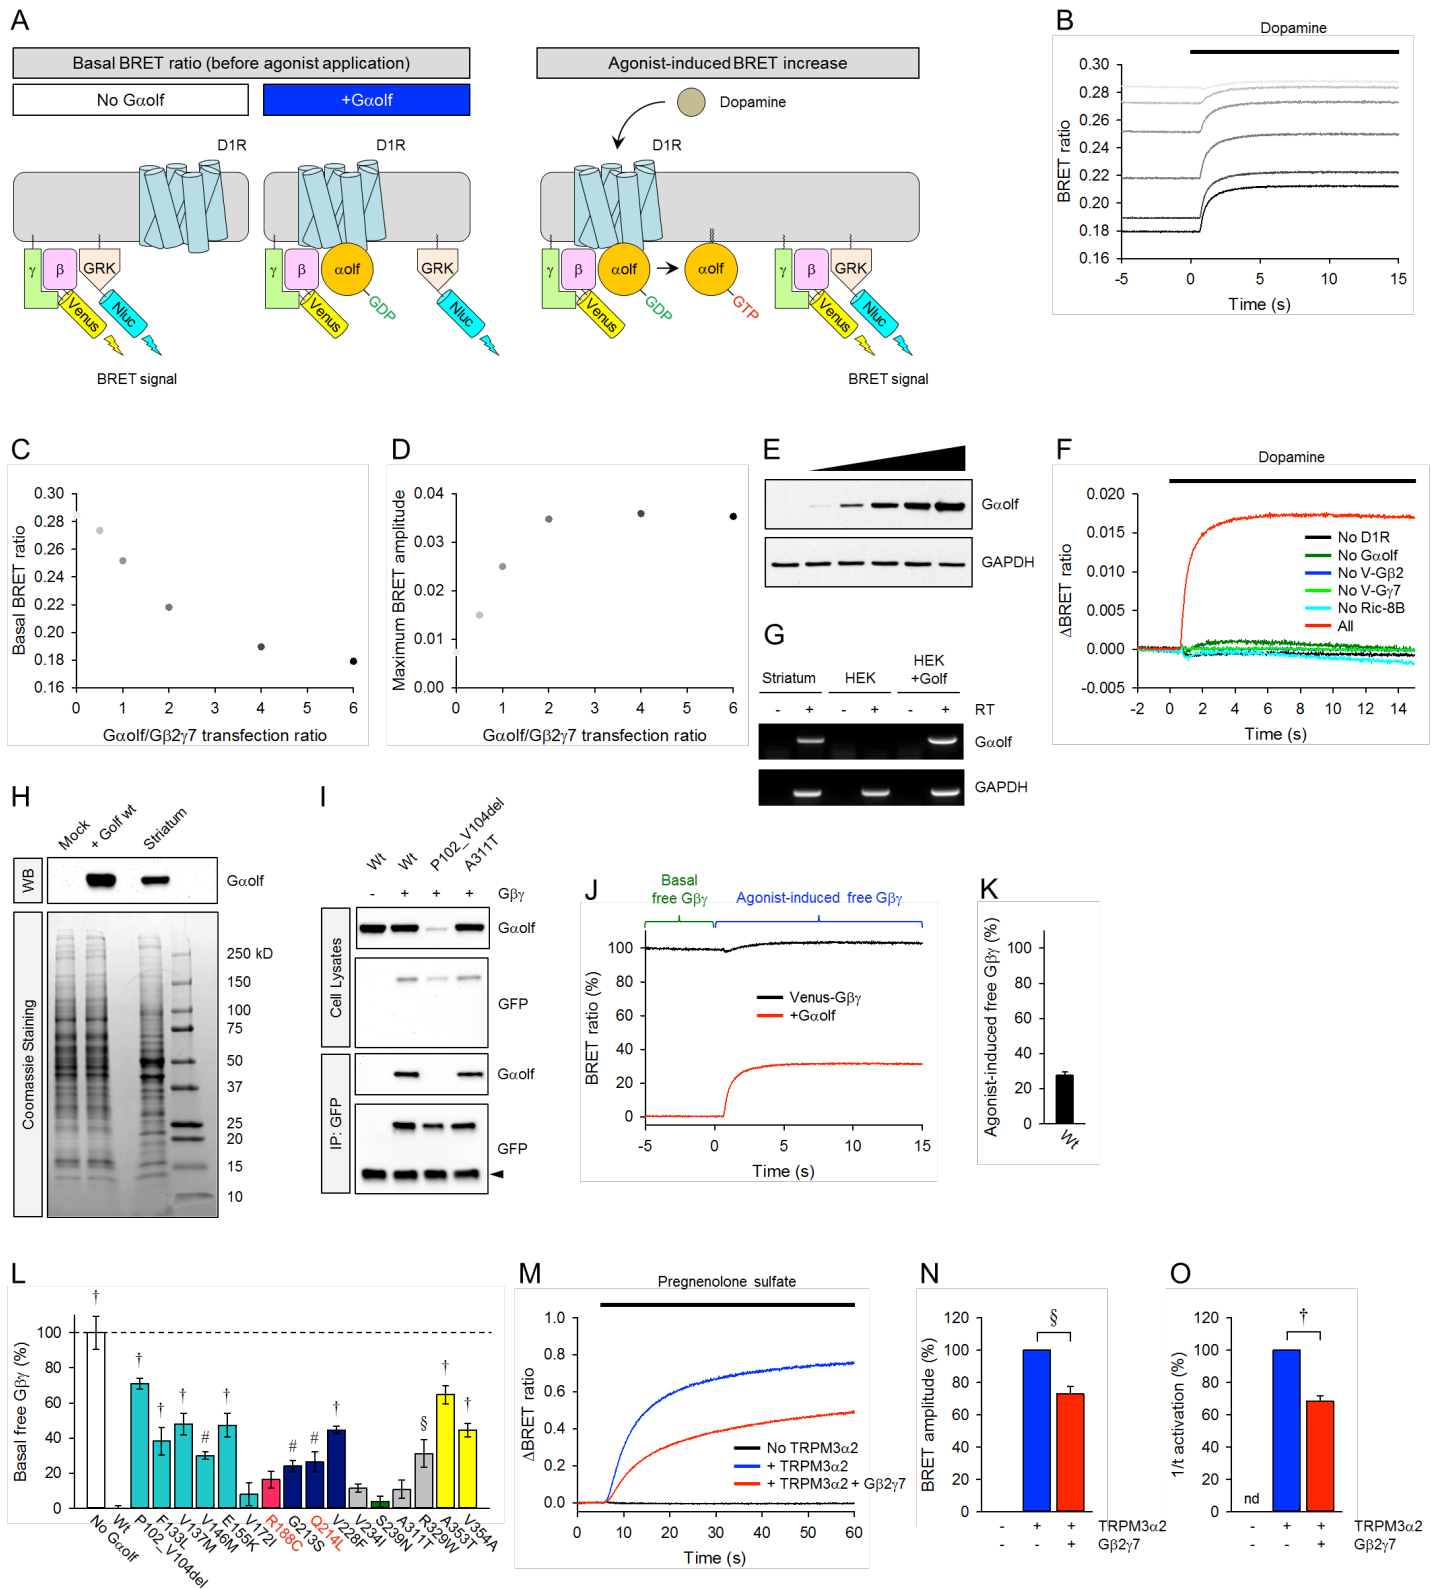

**Figure S3. Reconstitution of D1R-G $\alpha$ olf/G $\beta$ 2 $\gamma$ 7 pathway in HEK293T/17 cells and effects of G $\alpha$ olf mutations on G $\beta$  $\gamma$  signaling. Related to Figure 4.**

**A**, The assay design for optimizing stoichiometric G $\alpha$ olf/G $\beta$ 2 $\gamma$ 7 trimer. In the absence of exogenous G $\alpha$  subunit, expression of masGRK3ct-Nluc with Venus-G $\beta$ 2 $\gamma$ 7 produces masGRK3ct-Nluc-bound Venus-G $\beta$ 2 $\gamma$ 7, and

results in high basal BRET signal. In this condition, agonist application does not increase BRET signal because there is no functional trimer formation. Additional expression of G $\alpha$ olf sequesters Venus-G $\beta$ 2 $\gamma$ 7 from masGRK3ct-Nluc and decreases the BRET signal. Under optimal condition, agonist application induces robust BRET increase, indicating G $\alpha$ olf/G $\beta$ 2 $\gamma$ 7 trimer formation. Therefore, the transfection condition producing 1:1 ratio of G $\alpha$ olf and G $\beta$ 2 $\gamma$ 7 is expected to minimize basal BRET ratio (before agonist application) and maximize agonist-induced BRET response. **B-E**. Experimental optimization of the stoichiometry of G $\alpha$ olf and Venus-G $\beta$ 2 $\gamma$ 7. HEK293T/17 cells were transfected with plasmids encoding D1R, G $\alpha$ olf, Venus-G $\beta$ 2 $\gamma$ 7, masGRK3ct-Nluc. **B**, The stoichiometry of G $\alpha$ olf and Venus-G $\beta$ 2 $\gamma$ 7 were optimized by titrating the amount of G $\alpha$  subunits against a constant amount of Venus-G $\beta$ 2 $\gamma$ 7. Effect of increasing G $\alpha$  with constant Venus-G $\beta$ 2 $\gamma$ 7 for transient transfection on the basal BRET ratio and the agonist-induced maximum BRET amplitude were examined. 100  $\mu$ M dopamine was applied to the transfected cells. **C-D**, Basal BRET ratios and maximum BRET amplitudes are plotted as a function of the ratio of the amount of the G $\alpha$  subunit construct to the amount of the Venus-G $\beta$ 2 $\gamma$ 7 construct used for transfections, in the absence (basal BRET) (**C**) and presence (maximum amplitude) of a saturating concentration of dopamine (100  $\mu$ M) (**D**). Each data point represents the mean  $\pm$  SEM of twelve replicates. Graphs shown here are the representative data from two independent experiments with similar result. **E**, Western blot analysis was performed with anti-G $\alpha$ olf antibody. GAPDH was also probed with a specific antibody as a loading control. **F**, Verification of the reconstitution of D1R-G $\alpha$ olf/G $\beta$ 2 $\gamma$ 7 signaling. Each of the signaling molecule was removed from the optimized transfection condition and the BRET assay was performed with transfected cells. **G**, Semiquantitative analysis of G $\alpha$ olf mRNA in the striatum (*left*) and HEK293T/17 cells without (*middle*) or with transfection of Golf (*right*) were performed by RT-PCR. Reverse transcriptase was heat-inactivated under the minus (-) condition. The heat inactivation step was omitted under the plus (+) condition. RT-PCR with specific primers for GAPDH was performed as a control. **H**, Expression levels of G $\alpha$ olf protein in HEK293T/17 cells without (*left*) or with transfection of Golf (*middle*), and the striatum (*right*) were determined by Western blotting (*bottom*). Coomassie brilliant blue staining of a SDS-PAGE gel loaded with 10  $\mu$ g of cell or tissue lysate were performed as a loading control (*top*). **I**, Coimmunoprecipitation was performed with cells transfected with G $\alpha$ olf with or without Venus-G $\beta$ 2 $\gamma$ 7. Transfection conditions were indicated above. The bands indicated by an arrow head are antibody light chains, showing the same amount of anti-GFP antibody was used for immunoprecipitation. **J**, Percentage of agonist-induced free G $\beta$ 2 $\gamma$ 7 dimer. Basal BRET ratio under the presence of stoichiometric trimer formation was presented as 0% free G $\beta$ 2 $\gamma$ 7. Maximum free G $\beta$ 2 $\gamma$ 7 dimer was determined by transfection without G $\alpha$ olf. Percentage of agonist-induced free G $\beta$ 2 $\gamma$ 7 dimer was plotted as a bar graph (**K**). **L**, Percentage of free G $\beta$ 2 $\gamma$ 7 dimer produced by mutant G $\alpha$ olf subunits before agonist application was determined and plotted as a bar graph (n = 3 independent experiments).

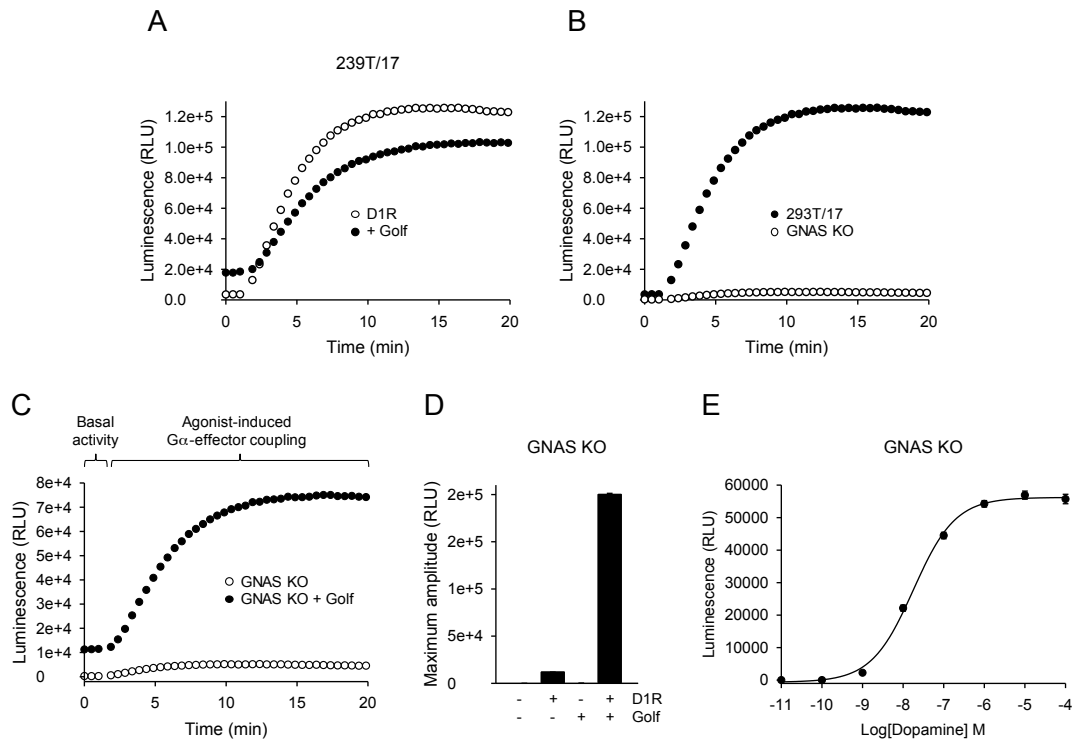

**Figure S4. Generation of a GNAS knockout cell line and reconstitution of D1R-Golf-AC signaling in the cells. Related to Figure 5.**

**A**, Agonist-induced cAMP production detected with GloSensor cAMP sensor. The agonist-induced cAMP production of HEK293T/17 cells transfected with (filled circle) or without (open circle) Gαolf. All cells were transfected with D1R and GloSensor-22F cAMP sensor. Values represent means  $\pm$  SEM from three independent experiments each performed with four replicates. **B**, Agonist-induced cAMP production of HEK293T/17 cells (filled circle) and *GNAS* KO cell line (open circle). All cells were transfected with D1R and GloSensor-22F cAMP sensor. Values represent means  $\pm$  SEM from three independent experiments each performed with four replicates. **C**, *GNAS* knockout cells were transfected with D1R and GloSensor-22F cAMP sensor together with (filled circle) or without (open circle) Gαolf. 100  $\mu$ M dopamine-induced cAMP production was recorded. **D**, Confirmation of selective D1R-Golf. D1R and Golf were transfected with GloSensor-22F cAMP sensor as indicated at the bottom of the bar graph. **E**, Determination of EC50. Dose-response relationship was examined using *GNAS* KO cells transfected with D1R, Gαolf, and GloSensor-22F cAMP sensor.

**Table S1. Genotype and clinical phenotype features of dystonia mutations used in the study.**

**Related to Figure 2.**

| Protein variant | Mutation site     | Mutation type     | Number of carrier reported | Ethnicity        | Gender      | Age of onset (years)      | Dystonia distribution           | Inheritance | Familial /sporadic | Reference                     |
|-----------------|-------------------|-------------------|----------------------------|------------------|-------------|---------------------------|---------------------------------|-------------|--------------------|-------------------------------|
| P102_V104del    | $\alpha$ -helical | In frame deletion | 1                          | Caucasian        | M           | 20                        | Fo                              | Het         | Familial           | Fuchs et al., 2013            |
| F133L           | $\alpha$ -helical | Missense          | 1                          | Brazilian        | F           | 23                        | S                               | Het         | Unknown            | Dos Santos et al., 2016       |
| V137M           | $\alpha$ -helical | Missense          | 7                          | Caucasian        | 4xF and 3xM | 7, 19, 22, 26, 31, 44, 50 | 6xS, 1xG                        | Het         | Familial           | Fuchs et al., 2013            |
| V146M           | $\alpha$ -helical | Missense          | 3                          | German           | 1xF         | 63                        | 1xS                             | Het         | Sporadic           | Zech et al., 2014             |
| E155K           | $\alpha$ -helical | Missense          | 2                          | Caucasian        | 2xM         | 17, 18                    | 1xFo, 1xS                       | Het         | Familial           | Fuchs et al., 2013            |
| V172I           | $\alpha$ -helical | Missense          | 1                          | Amish-Mennonites | F           | 21                        | S                               | Het         | Sporadic           | Saunders-Pullman et al., 2014 |
| G213S           | Switch II         | Missense          | 1                          | German           | M           | 40                        | Fo (no hyposmia)                | Het         | Unknown            | Kumar et al., 2014            |
| V228F           | Switch II         | Missense          | 5                          | African-American | 3xF, 2xM    | 45, 50, 50, 63, N/A       | 1xFo, 3xS, 1xG with 2xMicrosmia | Het         | Familial           | Vemula et al., 2013           |
| V234I           | GTPase            | Missense          | 1                          | Caucasian        | M           | 36                        | Fo                              | Het         | Sporadic           | Putzel et al., 2016           |
| S239N           | Switch III        | Missense          | 1                          | N/A              | N/A         | N/A                       | N/A                             | Het         | Unknown            | This study                    |
| A311T           | GTPase            | Missense          | 1                          | German           | N/A         | N/A                       | N/A                             | Het         | Sporadic           | Kumar et al., 2014            |
| R329W           | GTPase            | Missense          | 2                          | Turkish          | F           | 11 and 15                 | 2xG                             | Ho          | Familial           | Masaho et al., 2016           |
| A353T           | TCAT motif        | Missense          | 1                          | Japanese         | F           | 44                        | Fo (no hyposmia)                | Het         | Unknown            | Kumar et al., 2014            |
| V354A           | TCAT motif        | Missense          | 1                          | Serbian          | F           | 40                        | Fo                              | Het         | Sporadic           | Dobričić et al., 2014         |

M = Male, F = Female

Fo = Focal, S = Segmental, G = Generalized

Het = Heterozygous, Ho = Homozygous

**Table S2: Criteria for deleteriousness classification of amino acid substitutions using different methods. Related to Figure 2.**

| Predictor                                       | Classification criteria                                                                                                                                                                                                                           |
|-------------------------------------------------|---------------------------------------------------------------------------------------------------------------------------------------------------------------------------------------------------------------------------------------------------|
| Polyphen:<br>Polyphen2 HDIV<br>score (pp2_hdiv) | Deleterious: Probably damaging (pp2_hdiv $\geq$ 0.957), P: possibly damaging; Tolerated: Benign (pp2_hdiv $\leq$ 0.452) There were no DYT25 mutations in the possibly damaging category ( $0.453 \leq$ pp2_hdiv $\leq$ 0.956) (Wang et al., 2010) |
| SIFT                                            | Deleterious: SIFT score $\leq$ 0.05; Tolerated: SIFT score $>$ 0.05 (Wang et al., 2010)                                                                                                                                                           |
| CADD                                            | Deleterious: CADD PHRED-scaled score $>$ 20; Tolerated: CADD PHRED-scaled score $\leq$ 20 (Kircher et al., 2014)                                                                                                                                  |
| MetaLR                                          | Deleterious: MetaLR score $>$ 0.5; Tolerated: MetaLR score $\leq$ 0.5 (Dong et al., 2015)                                                                                                                                                         |
| REVEL                                           | Deleterious: REVEL score $>$ 0.5; Tolerated: REVEL score $\leq$ 0.5 (Ioannidis et al., 2016)                                                                                                                                                      |
